# Supplementary material for: α-Hederin promotes ferroptosis and reverses cisplatin chemoresistance in non-small cell lung cancer
Source: publisher site journal article supplement (doi:10.18632/aging.205408), 2024-01-18
Supplement: Supplementary file [file aging-v16i2-205408-supplementary-material-SD2.pdf]

**SUPPLEMENTARY FIGURES**

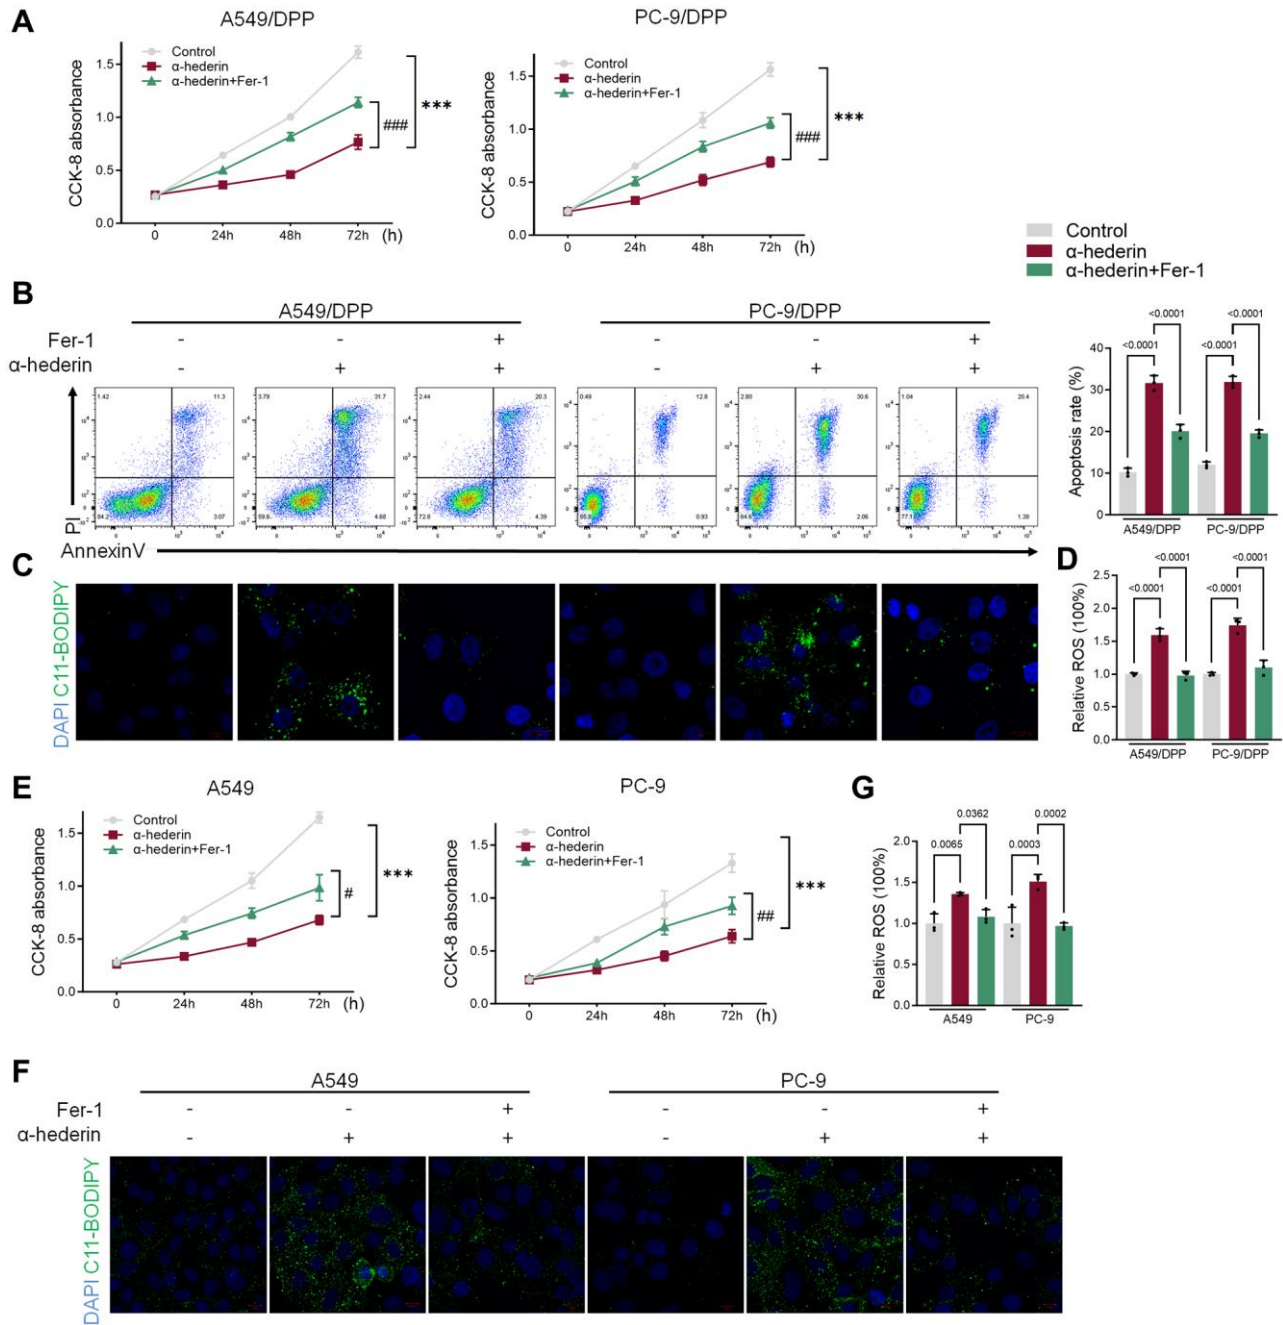

**Supplementary Figure 1. Inhibition of ferroptosis reversed the effect of  $\alpha$ -Hederin.** (A) CCK8 results showing the viability of A549/DPP and PC-9/DPP cells after treatment with  $\alpha$ -Hederin (50  $\mu$ M) and Fer-1 (5  $\mu$ M) for 24 hours. (B) Cell apoptosis was detected by flow cytometry. (C) Immunofluorescence assays were performed using C11-BODIPY (green) to determine oxidation and DAPI staining (blue) to detect Nuclei in A549/DPP and PC-9/DPP cells. (D) Cellular ROS levels were detected in A549/DPP and PC-9/DPP cells after treatment with  $\alpha$ -Hederin (50  $\mu$ M) and Fer-1 (5  $\mu$ M) for 24 hours. (E) CCK8 results showing the viability of A549 and PC-9 cells after treatment with  $\alpha$ -Hederin (50  $\mu$ M) and Fer-1 (5  $\mu$ M) for 24 hours. (F) Immunofluorescence assays were performed using C11-BODIPY (green) to determine oxidation and DAPI staining (blue) to detect Nuclei in A549 and PC-9 cells. (G) Cellular ROS levels were detected in A549 and PC-9 cells after treatment with  $\alpha$ -Hederin (50  $\mu$ M) and Fer-1 (5  $\mu$ M) for 24 hours. ( $n = 3$ ). Data are shown as mean  $\pm$  SD, One-way ANOVA.

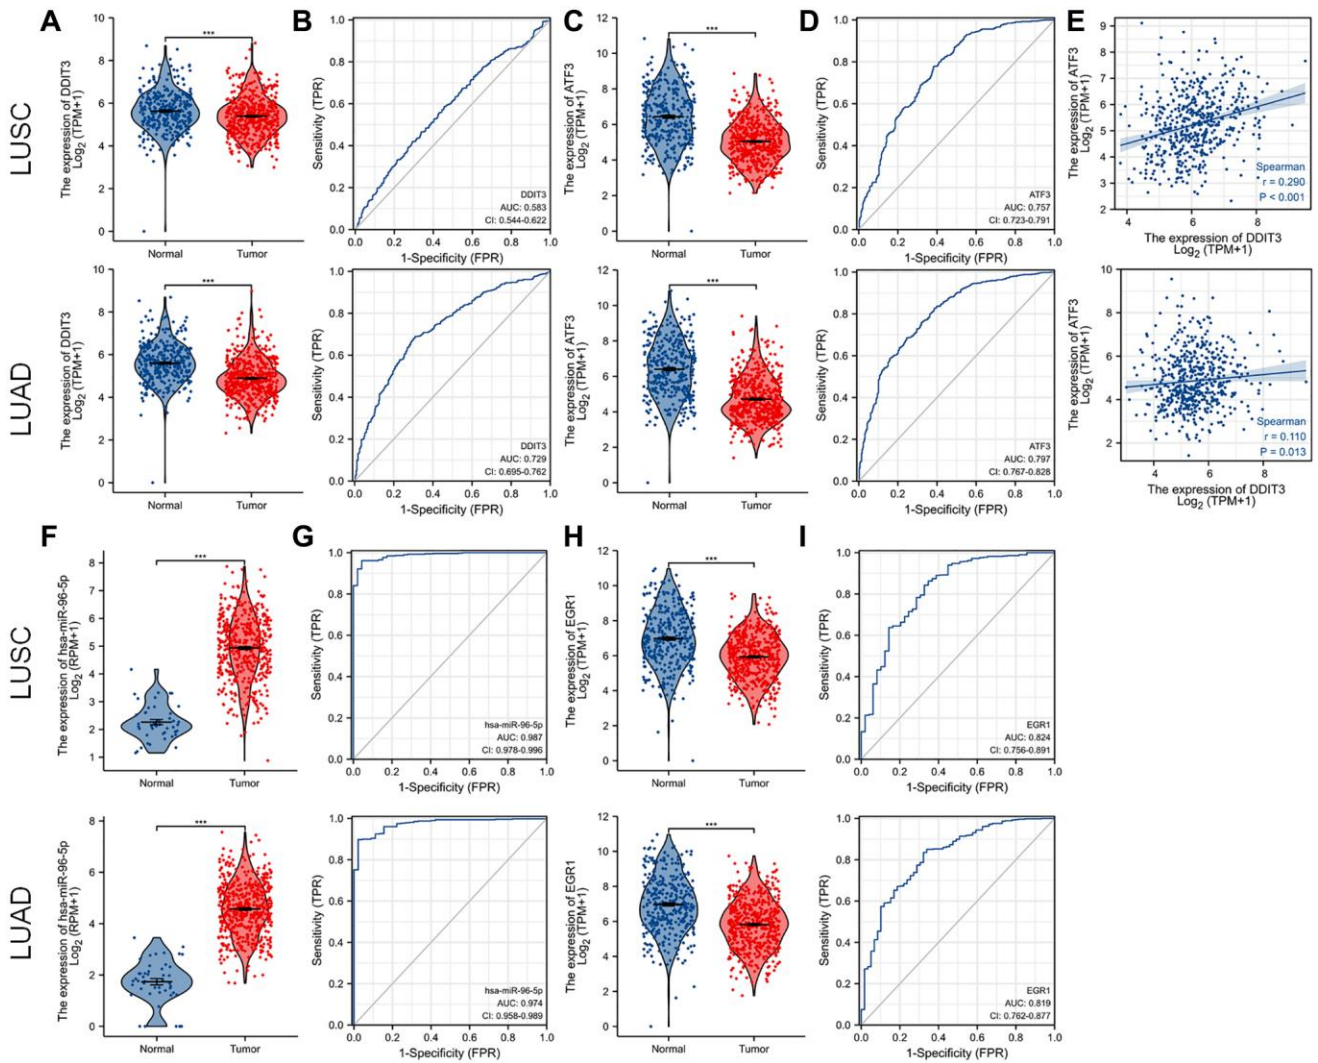

**Supplementary Figure 2. TCGA analysis of DDIT3, ATF3 and EGR1.** (A) DDIT3 levels in LUSC and LUAD tumor tissues in the TCGA database. (B) ROC curves for DDIT3 expression in LUSC and LUAD patients in the TCGA database. (C) ATF3 levels in LUSC and LUAD tumor tissues in the TCGA database. (D) ROC curves for ATF3 expression in LUSC and LUAD patients in the TCGA database. (E) Spearman correlation analysis was used to determine the correlation between DDIT3 and ATF3 in LUSC and LUAD in the TCGA database. (F) miR-96-5p levels in LUSC and LUAD tumor tissues in the TCGA database. (G) ROC curves for miR-96-5p expression in LUSC and LUAD in the TCGA database. (H) EGR1 levels in LUSC and LUAD tumor tissues in the TCGA database. (I) ROC curves for EGR1 expression in LUSC and LUAD in the TCGA database. Data are shown as mean  $\pm$  SD, \*\*\*One way ANOVA  $P < 0.001$ .
